# Supplementary material for: Ultrasound and Microwave Assisted Extraction of Opuntia Fruit Peels Biocompounds: Optimization and Comparison Using RSM-CCD
Source: PubMed Central journal article supplement (PMC6804160; doi:10.3390/molecules24193618), 2019-10-08

## Appendix A

**Table S1.** Betacyanins (mg/g of extract) identified in every single run and the total betacyanin content.

| Run | Peak 1  |       | Peak 2     |      | Peak 3       |     | Peak 4            |     | Peak 5               |     | Peak 6    |     | Peak 7       |     | Total betacyanins |       |
|-----|---------|-------|------------|------|--------------|-----|-------------------|-----|----------------------|-----|-----------|-----|--------------|-----|-------------------|-------|
|     | Betanin |       | Isobetanin |      | Gomphrenin I |     | (Iso)phyllocactin |     | 17 decarboxy-betanin |     | Betanidin |     | Isobetanidin |     | mg/g              |       |
|     | UAE     | MAE   | UAE        | MAE  | UAE          | MAE | UAE               | MAE | UAE                  | MAE | UAE       | MAE | UAE          | MAE | UAE               | MAE   |
| 1   | 144.0   | 90.4  | 21.6       | 12.6 | 4.8          | 1.7 | 2.2               | 0.4 | 2.0                  | 0.6 | 3.3       | 1.2 | 3.7          | 5.4 | 181.5             | 112.3 |
| 2   | 118.7   | 111.9 | 18.0       | 16.0 | 4.1          | 3.0 | 1.7               | 1.2 | 1.6                  | 0.9 | 2.3       | 1.5 | 2.5          | 5.7 | 148.8             | 140.1 |
| 3   | 107.6   | 95.2  | 16.2       | 13.0 | 3.3          | 1.8 | 1.6               | 1.0 | 1.3                  | 0.7 | 1.8       | 0.7 | 2.6          | 0.0 | 134.3             | 112.5 |
| 4   | 123.7   | 104.8 | 17.7       | 15.1 | 3.9          | 2.3 | 1.9               | 0.6 | 1.6                  | 0.2 | 2.3       | 2.0 | 1.9          | 4.2 | 152.9             | 129.3 |
| 5   | 91.0    | 91.5  | 11.1       | 12.2 | 2.8          | 2.0 | 1.0               | 1.0 | 0.9                  | 0.8 | 0.9       | 0.3 | 1.5          | 0.0 | 109.3             | 107.9 |
| 6   | 92.2    | 91.7  | 12.4       | 14.2 | 2.9          | 2.2 | 1.4               | 0.3 | 1.0                  | 0.6 | 1.2       | 0.9 | 1.3          | 3.5 | 112.5             | 113.5 |
| 7   | 100.4   | 117.1 | 13.4       | 17.2 | 3.2          | 2.5 | 1.4               | 0.4 | 1.1                  | 0.5 | 1.3       | 0.3 | 2.7          | 3.3 | 123.6             | 141.3 |
| 8   | 103.6   | 96.1  | 13.8       | 15.6 | 3.2          | 2.1 | 1.5               | 0.9 | 1.1                  | 0.6 | 1.8       | 2.0 | 2.8          | 2.5 | 127.8             | 119.7 |
| 9   | 135.2   | 67.6  | 20.8       | 10.0 | 4.5          | 1.0 | 1.8               | 0.2 | 1.8                  | 0.4 | 2.8       | 0.1 | 3.5          | 3.4 | 170.3             | 82.7  |
| 10  | 150.2   | 65.3  | 22.7       | 9.6  | 5.2          | 1.0 | 2.2               | 0.2 | 2.3                  | 0.4 | 3.2       | 0.8 | 3.7          | 3.1 | 189.5             | 80.5  |
| 11  | 107.5   | 92.4  | 16.6       | 16.4 | 3.3          | 1.6 | 1.2               | 0.1 | 1.2                  | 0.6 | 1.8       | 1.0 | 1.6          | 4.1 | 133.2             | 116.4 |
| 12  | 111.5   | 83.0  | 16.5       | 14.4 | 3.7          | 1.7 | 1.5               | 0.2 | 1.4                  | 0.1 | 2.2       | 3.7 | 1.7          | 4.4 | 138.6             | 107.6 |
| 13  | 116.1   | 43.1  | 16.0       | 7.5  | 4.1          | 1.0 | 1.8               | 0.2 | 1.5                  | 0.1 | 2.1       | 0.1 | 1.8          | 1.5 | 143.2             | 53.5  |
| 14  | 102.6   | 18.8  | 13.4       | 3.3  | 3.3          | 0.3 | 1.2               | 0.1 | 1.1                  | 0.2 | 1.3       | 0.3 | 1.8          | 2.0 | 124.7             | 25.1  |
| 15  | 94.8    | 52.1  | 12.7       | 10.6 | 2.9          | 1.2 | 1.1               | 0.7 | 0.9                  | 0.4 | 1.6       | 1.2 | 1.6          | 0.0 | 115.7             | 66.3  |
| 16  | 97.1    | 44.2  | 13.4       | 10.0 | 3.0          | 1.2 | 1.4               | 0.2 | 1.0                  | 0.2 | 1.1       | 0.7 | 2.4          | 3.1 | 119.3             | 59.6  |
| 17  | 126.3   | 88.7  | 19.1       | 14.8 | 3.9          | 1.8 | 1.8               | 0.5 | 1.3                  | 0.2 | 2.2       | 0.6 | 4.4          | 0.0 | 159.1             | 106.6 |
| 18  | 136.3   | 60.9  | 21.3       | 10.8 | 4.6          | 1.5 | 2.1               | 0.1 | 1.8                  | 0.2 | 3.3       | 2.3 | 4.5          | 1.3 | 173.9             | 77.1  |
| 19  | 156.1   | 78.6  | 23.6       | 11.5 | 5.1          | 1.4 | 2.3               | 0.4 | 2.0                  | 0.4 | 3.7       | 0.5 | 4.6          | 4.0 | 197.5             | 96.8  |

|    |       |       |      |      |     |     |     |     |     |     |     |     |     |     |       |       |
|----|-------|-------|------|------|-----|-----|-----|-----|-----|-----|-----|-----|-----|-----|-------|-------|
| 20 | 126.6 | 55.9  | 18.8 | 16.5 | 4.4 | 2.2 | 2.3 | 0.9 | 1.6 | 0.7 | 2.6 | 1.5 | 3.5 | 2.2 | 159.7 | 79.8  |
| 21 | 139.0 | 127.0 | 21.4 | 18.2 | 4.6 | 3.4 | 2.1 | 1.2 | 2.4 | 0.9 | 2.8 | 1.3 | 2.2 | 3.2 | 174.5 | 155.1 |
| 22 | 58.6  | 16.7  | 7.2  | 30.8 | 1.8 | 5.0 | 0.8 | 0.1 | 0.6 | 0.6 | 0.9 | 0.0 | 2.1 | 0.0 | 72.0  | 53.2  |
| 23 | 108.0 | 113.3 | 15.2 | 15.8 | 3.4 | 2.5 | 1.7 | 1.6 | 1.3 | 1.2 | 2.0 | 0.8 | 2.1 | 0.0 | 133.8 | 135.1 |
| 24 | 140.6 | 25.8  | 21.8 | 16.5 | 5.1 | 4.8 | 2.5 | 0.9 | 1.7 | 0.3 | 3.4 | 1.2 | 4.1 | 0.0 | 179.2 | 49.4  |
| 25 | 116.3 | 92.1  | 16.1 | 12.5 | 3.7 | 1.5 | 1.4 | 0.5 | 1.2 | 0.2 | 1.7 | 0.7 | 2.6 | 0.0 | 143.0 | 107.6 |
| 26 | 144.9 | 95.1  | 23.2 | 14.9 | 5.3 | 2.1 | 2.3 | 1.3 | 1.9 | 0.9 | 3.1 | 0.5 | 3.6 | 0.0 | 184.3 | 114.8 |
| 27 | 106.8 | 93.0  | 16.9 | 14.4 | 3.6 | 1.8 | 1.5 | 0.8 | 1.3 | 0.8 | 2.2 | 1.0 | 2.3 | 0.0 | 134.7 | 111.8 |
| 28 | 149.9 | 102.8 | 22.8 | 16.1 | 5.1 | 2.4 | 2.4 | 0.2 | 1.8 | 0.7 | 2.8 | 0.8 | 2.7 | 4.1 | 187.4 | 127.1 |
| 29 | 128.8 | 101.6 | 19.7 | 15.9 | 4.3 | 1.8 | 2.0 | 0.3 | 1.6 | 0.7 | 2.2 | 1.3 | 2.6 | 4.6 | 161.2 | 126.3 |
| 30 | 134.7 | 94.1  | 19.4 | 14.4 | 4.8 | 1.6 | 2.3 | 0.3 | 1.7 | 0.5 | 2.5 | 0.3 | 3.6 | 3.4 | 169.0 | 114.7 |
| 31 | 131.6 | 90.4  | 19.6 | 12.6 | 4.4 | 1.7 | 2.1 | 0.4 | 1.7 | 0.6 | 2.5 | 1.2 | 3.2 | 5.4 | 165.0 | 112.3 |

---

**Table S2.** Phenolic acids (mg/g of extract) identified in every single run and the total phenolic acid content.

| Run | Peak 1        |      | Peak 2                  |      | Peak 3                   |      | Peak 4                |      | Total phenolic acids |      |
|-----|---------------|------|-------------------------|------|--------------------------|------|-----------------------|------|----------------------|------|
|     | Piscidic acid |      | 3-O-Feruloylquinic acid |      | <i>cis</i> -Caffeic acid |      | Ferulic acid hexoside |      | mg/g                 |      |
|     | UAE           | MAE  | UAE                     | MAE  | UAE                      | MAE  | UAE                   | MAE  | UAE                  | MAE  |
| 1   | 8.46          | 6.30 | n/d                     | 0.03 | 0.38                     | 0.02 | 0.07                  | 0.07 | 8.91                 | 6.41 |
| 2   | 6.85          | 6.89 | n/d                     | 0.02 | 0.36                     | 0.02 | 0.06                  | 0.08 | 7.26                 | 7.01 |
| 3   | 6.00          | 5.57 | 0.08                    | 0.02 | 0.25                     | 0.01 | 0.05                  | 0.07 | 6.39                 | 5.66 |
| 4   | 6.86          | 6.51 | n/d                     | 0.02 | 0.37                     | 0.03 | 0.06                  | 0.07 | 7.29                 | 6.62 |
| 5   | 6.34          | 5.71 | 0.09                    | 0.02 | 0.21                     | 0.00 | 0.05                  | 0.06 | 6.69                 | 5.80 |
| 6   | 6.03          | 6.12 | 0.08                    | 0.02 | 0.24                     | 0.01 | 0.05                  | 0.08 | 6.40                 | 6.23 |
| 7   | 6.59          | 7.32 | n/d                     | 0.03 | 0.34                     | 0.02 | 0.06                  | 0.09 | 6.98                 | 7.46 |
| 8   | 6.62          | 6.33 | n/d                     | 0.02 | 0.35                     | 0.01 | 0.06                  | 0.06 | 7.04                 | 6.42 |
| 9   | 8.11          | 5.52 | n/d                     | 0.01 | 0.43                     | 0.01 | 0.07                  | 0.07 | 8.61                 | 5.60 |
| 10  | 12.13         | 5.50 | 0.71                    | 0.01 | 0.06                     | 0.01 | 0.09                  | 0.07 | 12.99                | 5.59 |
| 11  | 6.23          | 6.07 | 0.07                    | 0.03 | 0.24                     | 0.02 | 0.05                  | 0.08 | 6.60                 | 6.20 |
| 12  | 6.44          | 6.54 | n/d                     | 0.01 | 0.32                     | 0.04 | 0.05                  | 0.07 | 6.81                 | 6.65 |
| 13  | 7.28          | 7.14 | 0.00                    | 0.01 | 0.36                     | 0.02 | 0.07                  | 0.06 | 7.71                 | 7.23 |
| 14  | 6.60          | 3.95 | n/d                     | 0.01 | 0.34                     | 0.01 | 0.06                  | 0.04 | 7.00                 | 4.01 |
| 15  | 6.13          | 6.22 | 0.09                    | 0.03 | 0.25                     | 0.00 | 0.06                  | 0.07 | 6.52                 | 6.32 |
| 16  | 6.33          | 6.59 | n/d                     | 0.04 | 0.36                     | 0.02 | 0.06                  | 0.07 | 6.75                 | 6.73 |
| 17  | 7.93          | 6.08 | 0.10                    | 0.02 | 0.28                     | 0.01 | 0.06                  | 0.06 | 8.37                 | 6.18 |
| 18  | 7.92          | 6.12 | n/d                     | 0.02 | 0.40                     | 0.01 | 0.07                  | 0.07 | 8.39                 | 6.22 |
| 19  | 9.05          | 5.94 | n/d                     | 0.01 | 0.45                     | 0.01 | 0.08                  | 0.07 | 9.58                 | 6.03 |
| 20  | 7.33          | 6.48 | n/d                     | 0.01 | 0.35                     | 0.02 | 0.06                  | 0.07 | 7.75                 | 6.57 |

|    |      |      |      |      |      |      |      |      |      |      |
|----|------|------|------|------|------|------|------|------|------|------|
| 21 | 7.78 | 6.34 | n/d  | 0.01 | 0.38 | 0.03 | 0.06 | 0.06 | 8.22 | 6.43 |
| 22 | 6.21 | 5.99 | n/d  | 0.04 | 0.28 | 0.01 | 0.05 | 0.06 | 6.53 | 6.10 |
| 23 | 6.28 | 6.70 | 0.12 | 0.01 | 0.21 | 0.01 | 0.05 | 0.06 | 6.66 | 6.78 |
| 24 | 7.83 | 6.48 | n/d  | 0.02 | 0.41 | 0.02 | 0.06 | 0.07 | 8.31 | 6.60 |
| 25 | 7.00 | 6.61 | 0.10 | 0.04 | 0.28 | 0.02 | 0.06 | 0.07 | 7.44 | 6.74 |
| 26 | 8.61 | 5.93 | n/d  | 0.00 | 0.49 | 0.01 | 0.07 | 0.07 | 9.17 | 6.02 |
| 27 | 6.17 | 5.76 | n/d  | 0.02 | 0.34 | 0.02 | 0.05 | 0.08 | 6.56 | 5.87 |
| 28 | 8.41 | 6.07 | 0.19 | 0.03 | 0.30 | 0.04 | 0.07 | 0.06 | 8.97 | 6.20 |
| 29 | 7.19 | 6.06 | 0.12 | 0.02 | 0.29 | 0.01 | 0.06 | 0.08 | 7.66 | 6.18 |
| 30 | 8.00 | 6.68 | 0.13 | 0.02 | 0.35 | 0.02 | 0.07 | 0.09 | 8.55 | 6.81 |
| 31 | 7.57 | 6.84 | n/d  | 0.02 | 0.35 | 0.01 | 0.06 | 0.08 | 7.98 | 6.95 |

---

**Table S3.** Flavonoids (mg/g of extract) identified in every single run and the total flavonoid content.

| Run | Peak 1                                                                 |      | Peak 2                                                   |      | Peak 3                       |      | Peak 4                    |      | Peak 5                    |      | Peak 6                                             |      | Peak 7                                                  |      | Peak 8                                          |      | Total flavonoids |      |
|-----|------------------------------------------------------------------------|------|----------------------------------------------------------|------|------------------------------|------|---------------------------|------|---------------------------|------|----------------------------------------------------|------|---------------------------------------------------------|------|-------------------------------------------------|------|------------------|------|
|     | Isorhamnetin- <i>O</i> -hexoside- <i>O</i> -(di-deoxyhexosyl-hexoside) |      | Isorhamnetin- <i>O</i> -hexoside-(deoxyhexosyl-hexoside) |      | Apigenin- <i>O</i> -hexoside |      | Isorhamnetin-dirutinoside |      | Isorhamnetin-dirutinoside |      | Isorhamnetin- <i>O</i> -(di-deoxyhexosyl-hexoside) |      | Isorhamnetin- <i>O</i> -hexosyl-(deoxyhexosyl-hexoside) |      | Isorhamnetin- <i>O</i> -(deoxyhexosyl-hexoside) |      | mg/g             |      |
|     | UAE                                                                    | MAE  | UAE                                                      | MAE  | UAE                          | MAE  | UAE                       | MAE  | UAE                       | MAE  | UAE                                                | MAE  | UAE                                                     | MAE  | UAE                                             | MAE  | UAE              | MAE  |
| 1   | 0.38                                                                   | 0.23 | 0.09                                                     | 0.06 | 0.31                         | 0.29 | 0.11                      | 0.08 | 0.03                      | 0.03 | 0.13                                               | 0.14 | 0.08                                                    | 0.10 | 0.00                                            | 0.02 | 1.13             | 0.94 |
| 2   | 0.34                                                                   | 0.29 | 0.03                                                     | 0.10 | 0.30                         | 0.35 | 0.09                      | 0.09 | 0.02                      | 0.03 | 0.11                                               | 0.18 | 0.06                                                    | 0.09 | 0.01                                            | 0.03 | 0.95             | 1.16 |
| 3   | 0.22                                                                   | 0.22 | 0.04                                                     | 0.04 | 0.25                         | 0.25 | 0.08                      | 0.06 | 0.02                      | 0.02 | 0.10                                               | 0.13 | 0.06                                                    | 0.06 | 0.00                                            | 0.01 | 0.77             | 0.80 |
| 4   | 0.31                                                                   | 0.20 | 0.03                                                     | 0.03 | 0.24                         | 0.26 | 0.09                      | 0.07 | 0.02                      | 0.03 | 0.10                                               | 0.11 | 0.06                                                    | 0.06 | 0.02                                            | 0.01 | 0.88             | 0.76 |
| 5   | 0.25                                                                   | 0.23 | 0.03                                                     | 0.07 | 0.20                         | 0.18 | 0.09                      | 0.02 | 0.02                      | 0.02 | 0.08                                               | 0.13 | 0.05                                                    | 0.06 | 0.01                                            | 0.03 | 0.73             | 0.72 |
| 6   | 0.30                                                                   | 0.24 | 0.05                                                     | 0.10 | 0.28                         | 0.36 | 0.10                      | 0.09 | 0.03                      | 0.04 | 0.11                                               | 0.16 | 0.07                                                    | 0.09 | 0.01                                            | 0.03 | 0.96             | 1.09 |
| 7   | 0.31                                                                   | 0.28 | 0.06                                                     | 0.09 | 0.31                         | 0.35 | 0.10                      | 0.10 | 0.02                      | 0.04 | 0.10                                               | 0.16 | 0.06                                                    | 0.09 | 0.01                                            | 0.02 | 0.96             | 1.13 |
| 8   | 0.29                                                                   | 0.22 | 0.03                                                     | 0.08 | 0.27                         | 0.29 | 0.08                      | 0.07 | 0.02                      | 0.03 | 0.11                                               | 0.13 | 0.06                                                    | 0.06 | 0.01                                            | 0.01 | 0.88             | 0.89 |
| 9   | 0.35                                                                   | 0.20 | 0.06                                                     | 0.05 | 0.37                         | 0.30 | 0.09                      | 0.07 | 0.03                      | 0.03 | 0.14                                               | 0.15 | 0.09                                                    | 0.09 | 0.01                                            | 0.02 | 1.14             | 0.90 |
| 10  | 0.55                                                                   | 0.20 | 0.28                                                     | 0.05 | 0.59                         | 0.29 | 0.19                      | 0.07 | 0.07                      | 0.03 | 0.23                                               | 0.15 | 0.13                                                    | 0.09 | 0.02                                            | 0.01 | 2.06             | 0.88 |
| 11  | 0.21                                                                   | 0.28 | 0.07                                                     | 0.09 | 0.25                         | 0.31 | 0.07                      | 0.08 | 0.02                      | 0.03 | 0.09                                               | 0.15 | 0.06                                                    | 0.08 | 0.00                                            | 0.02 | 0.79             | 1.02 |
| 12  | 0.31                                                                   | 0.21 | 0.04                                                     | 0.08 | 0.27                         | 0.27 | 0.09                      | 0.07 | 0.02                      | 0.03 | 0.09                                               | 0.12 | 0.06                                                    | 0.06 | 0.00                                            | 0.01 | 0.89             | 0.86 |
| 13  | 0.35                                                                   | 0.29 | 0.06                                                     | 0.12 | 0.34                         | 0.26 | 0.12                      | 0.01 | 0.03                      | 0.05 | 0.14                                               | 0.19 | 0.08                                                    | 0.10 | 0.01                                            | 0.02 | 1.13             | 1.03 |
| 14  | 0.30                                                                   | 0.13 | 0.05                                                     | 0.02 | 0.30                         | 0.15 | 0.09                      | 0.05 | 0.02                      | 0.01 | 0.11                                               | 0.07 | 0.07                                                    | 0.04 | 0.02                                            | 0.00 | 0.96             | 0.47 |
| 15  | 0.29                                                                   | 0.24 | 0.03                                                     | 0.06 | 0.24                         | 0.31 | 0.08                      | 0.09 | 0.02                      | 0.03 | 0.10                                               | 0.14 | 0.06                                                    | 0.07 | 0.01                                            | 0.02 | 0.83             | 0.93 |
| 16  | 0.32                                                                   | 0.23 | 0.05                                                     | 0.06 | 0.29                         | 0.30 | 0.10                      | 0.07 | 0.02                      | 0.03 | 0.10                                               | 0.14 | 0.06                                                    | 0.08 | 0.01                                            | 0.02 | 0.95             | 0.91 |
| 17  | 0.23                                                                   | 0.24 | 0.10                                                     | 0.06 | 0.31                         | 0.27 | 0.08                      | 0.06 | 0.03                      | 0.03 | 0.13                                               | 0.13 | 0.06                                                    | 0.06 | 0.01                                            | 0.02 | 0.96             | 0.87 |
| 18  | 0.37                                                                   | 0.22 | 0.06                                                     | 0.09 | 0.37                         | 0.31 | 0.12                      | 0.07 | 0.03                      | 0.04 | 0.15                                               | 0.13 | 0.09                                                    | 0.07 | 0.01                                            | 0.01 | 1.21             | 0.94 |

|    |      |      |      |      |      |      |      |      |      |      |      |      |      |      |      |      |      |      |
|----|------|------|------|------|------|------|------|------|------|------|------|------|------|------|------|------|------|------|
| 19 | 0.40 | 0.25 | 0.05 | 0.06 | 0.41 | 0.33 | 0.13 | 0.08 | 0.04 | 0.02 | 0.15 | 0.15 | 0.09 | 0.08 | 0.01 | 0.01 | 1.28 | 0.99 |
| 20 | 0.34 | 0.26 | 0.04 | 0.11 | 0.30 | 0.29 | 0.13 | 0.08 | 0.02 | 0.03 | 0.12 | 0.13 | 0.07 | 0.06 | 0.01 | 0.02 | 1.02 | 0.99 |
| 21 | 0.32 | 0.21 | 0.05 | 0.06 | 0.35 | 0.29 | 0.08 | 0.07 | 0.03 | 0.03 | 0.13 | 0.12 | 0.07 | 0.07 | 0.01 | 0.01 | 1.03 | 0.86 |
| 22 | 0.21 | 0.20 | 0.03 | 0.04 | 0.19 | 0.25 | 0.04 | 0.05 | 0.03 | 0.02 | 0.09 | 0.12 | 0.04 | 0.06 | 0.01 | 0.01 | 0.64 | 0.76 |
| 23 | 0.27 | 0.13 | 0.04 | 0.07 | 0.24 | 0.27 | 0.08 | 0.07 | 0.02 | 0.03 | 0.09 | 0.13 | 0.05 | 0.06 | 0.01 | 0.01 | 0.81 | 0.78 |
| 24 | 0.37 | 0.26 | 0.05 | 0.06 | 0.35 | 0.30 | 0.12 | 0.07 | 0.04 | 0.03 | 0.13 | 0.13 | 0.08 | 0.06 | 0.01 | 0.02 | 1.15 | 0.93 |
| 25 | 0.32 | 0.28 | 0.05 | 0.08 | 0.28 | 0.33 | 0.11 | 0.07 | 0.02 | 0.03 | 0.11 | 0.16 | 0.08 | 0.08 | 0.02 | 0.02 | 0.99 | 1.04 |
| 26 | 0.38 | 0.20 | 0.06 | 0.04 | 0.38 | 0.30 | 0.11 | 0.08 | 0.03 | 0.03 | 0.14 | 0.14 | 0.09 | 0.06 | 0.01 | 0.02 | 1.21 | 0.87 |
| 27 | 0.30 | 0.20 | 0.05 | 0.08 | 0.31 | 0.30 | 0.09 | 0.07 | 0.02 | 0.03 | 0.11 | 0.15 | 0.07 | 0.08 | 0.01 | 0.02 | 0.96 | 0.93 |
| 28 | 0.41 | 0.24 | 0.05 | 0.10 | 0.36 | 0.23 | 0.12 | 0.01 | 0.03 | 0.03 | 0.13 | 0.14 | 0.08 | 0.08 | 0.01 | 0.03 | 1.20 | 0.86 |
| 29 | 0.31 | 0.20 | 0.06 | 0.07 | 0.30 | 0.29 | 0.10 | 0.08 | 0.02 | 0.03 | 0.12 | 0.14 | 0.07 | 0.07 | 0.01 | 0.02 | 0.98 | 0.90 |
| 30 | 0.24 | 0.27 | 0.10 | 0.07 | 0.29 | 0.36 | 0.10 | 0.09 | 0.03 | 0.02 | 0.12 | 0.17 | 0.06 | 0.08 | 0.01 | 0.04 | 0.95 | 1.09 |
| 31 | 0.30 | 0.29 | 0.07 | 0.07 | 0.32 | 0.34 | 0.10 | 0.10 | 0.04 | 0.03 | 0.13 | 0.16 | 0.07 | 0.08 | 0.01 | 0.02 | 1.03 | 1.08 |

---

**Table S4.** Colour coordinates acquired in the 31 runs for UAE and MAE. Terms used include: L\*: lightness; a\*: green-red colour component; b\*: blue-yellow colour component and C: Chroma.

| Run | Colour coordinates |       |       |       |        |       |       |       |        |     |
|-----|--------------------|-------|-------|-------|--------|-------|-------|-------|--------|-----|
|     | L*                 |       | a*    |       |        |       | b*    |       | Chroma |     |
|     | UAE                | MAE   | UAE   | MAE   | UAE    | MAE   | UAE   | MAE   | UAE    | MAE |
| 1   | 43.82              | 36.12 | 83.84 | 76.12 | -22.35 | -0.99 | 86.77 | 76.12 |        |     |
| 2   | 45.36              | 49.71 | 84.50 | 74.89 | -23.90 | 26.47 | 87.82 | 79.43 |        |     |
| 3   | 47.39              | 46.89 | 85.33 | 78.96 | -26.95 | 18.42 | 89.49 | 81.08 |        |     |
| 4   | 48.17              | 37.51 | 83.07 | 77.84 | -24.19 | -3.40 | 86.52 | 77.92 |        |     |
| 5   | 45.50              | 38.62 | 84.51 | 76.27 | -22.47 | 4.67  | 87.44 | 76.41 |        |     |
| 6   | 47.70              | 50.57 | 85.37 | 74.00 | -24.99 | 24.80 | 88.95 | 78.05 |        |     |
| 7   | 43.99              | 37.31 | 83.30 | 74.05 | -21.97 | 11.04 | 86.15 | 74.87 |        |     |
| 8   | 46.60              | 38.17 | 86.48 | 76.71 | -25.64 | 3.88  | 90.20 | 76.80 |        |     |
| 9   | 45.84              | 45.24 | 85.24 | 73.07 | -23.82 | 25.69 | 88.51 | 77.46 |        |     |
| 10  | 45.60              | 36.20 | 84.99 | 75.34 | -23.10 | 3.32  | 88.08 | 75.41 |        |     |
| 11  | 45.93              | 38.43 | 85.18 | 73.83 | -24.28 | 8.39  | 88.57 | 75.01 |        |     |
| 12  | 48.44              | 40.32 | 86.35 | 75.52 | -26.97 | 13.48 | 90.46 | 76.72 |        |     |
| 13  | 48.81              | 37.01 | 86.25 | 77.75 | -27.53 | 0.38  | 90.54 | 77.75 |        |     |
| 14  | 55.56              | 34.01 | 76.34 | 72.32 | -23.63 | 0.36  | 79.91 | 72.33 |        |     |
| 15  | 44.73              | 36.78 | 83.56 | 77.28 | -22.94 | -1.61 | 86.65 | 77.30 |        |     |
| 16  | 48.48              | 35.41 | 86.56 | 73.50 | -27.00 | 5.64  | 90.67 | 73.72 |        |     |
| 17  | 44.76              | 35.11 | 84.74 | 73.47 | -22.46 | 6.12  | 87.66 | 73.73 |        |     |
| 18  | 43.87              | 35.24 | 83.12 | 74.33 | -21.03 | 1.23  | 85.74 | 74.34 |        |     |
| 19  | 43.14              | 41.82 | 83.22 | 76.36 | -21.64 | 16.74 | 85.99 | 78.18 |        |     |
| 20  | 44.36              | 35.54 | 84.80 | 74.08 | -21.43 | 5.65  | 87.47 | 74.30 |        |     |
| 21  | 45.24              | 34.86 | 84.83 | 74.35 | -22.22 | 0.36  | 87.69 | 74.36 |        |     |
| 22  | 43.76              | 34.09 | 83.32 | 72.65 | -20.83 | 1.82  | 85.89 | 72.67 |        |     |
| 23  | 48.05              | 36.70 | 85.75 | 75.18 | -24.05 | 3.41  | 89.06 | 75.26 |        |     |
| 24  | 45.35              | 35.46 | 84.89 | 73.99 | -21.61 | 4.10  | 87.60 | 74.10 |        |     |
| 25  | 47.51              | 36.19 | 85.71 | 72.86 | -22.68 | 8.00  | 88.65 | 73.29 |        |     |
| 26  | 44.18              | 37.42 | 83.35 | 73.53 | -20.70 | 8.36  | 85.88 | 74.00 |        |     |
| 27  | 44.96              | 36.78 | 84.71 | 77.95 | -21.22 | -5.64 | 87.32 | 78.16 |        |     |
| 28  | 44.50              | 34.71 | 84.58 | 73.31 | -20.55 | 5.84  | 87.04 | 73.54 |        |     |
| 29  | 46.12              | 34.93 | 84.76 | 59.35 | -23.37 | 26.34 | 87.93 | 64.99 |        |     |
| 30  | 43.67              | 35.31 | 83.03 | 75.06 | -19.85 | -0.79 | 85.37 | 75.07 |        |     |
| 31  | 44.40              | 35.39 | 83.24 | 74.07 | -19.78 | 5.28  | 85.56 | 74.26 |        |     |

Figure S1. Total betacyanin content 3d response surface plots of UAE and MAE for the parametric responses. For representation purposes, the 2 variable which are not confronted, were positioned at the centre of their experimental domain.

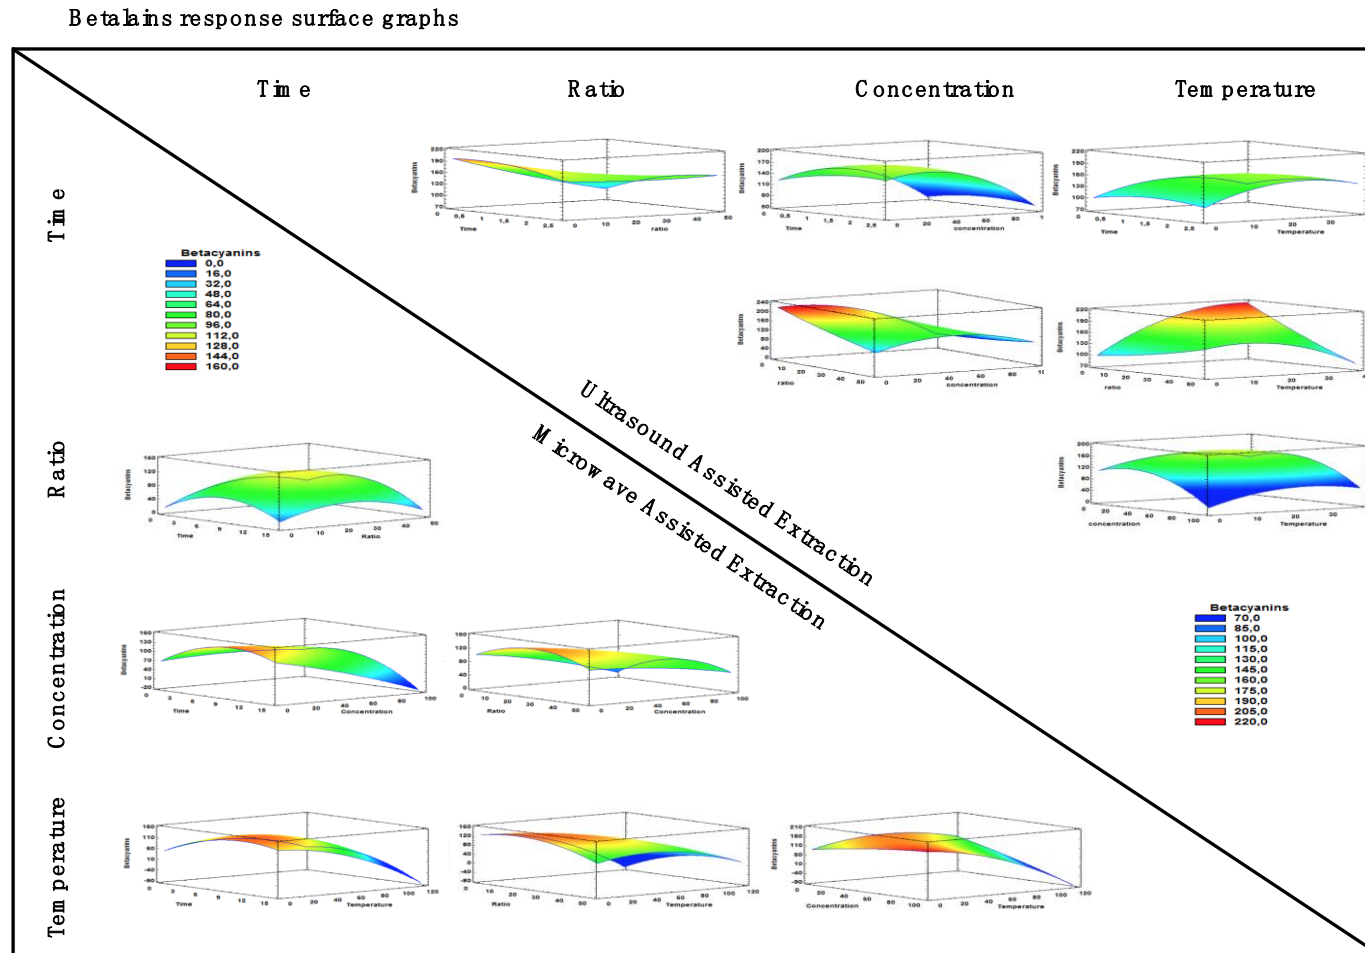





Figure S3. Total flavonoid content 3d response surface plots of UAE and MAE for the parametric responses. For representation purposes, the 2 variable which are not confronted, were positioned at the centre of their experimental domain.

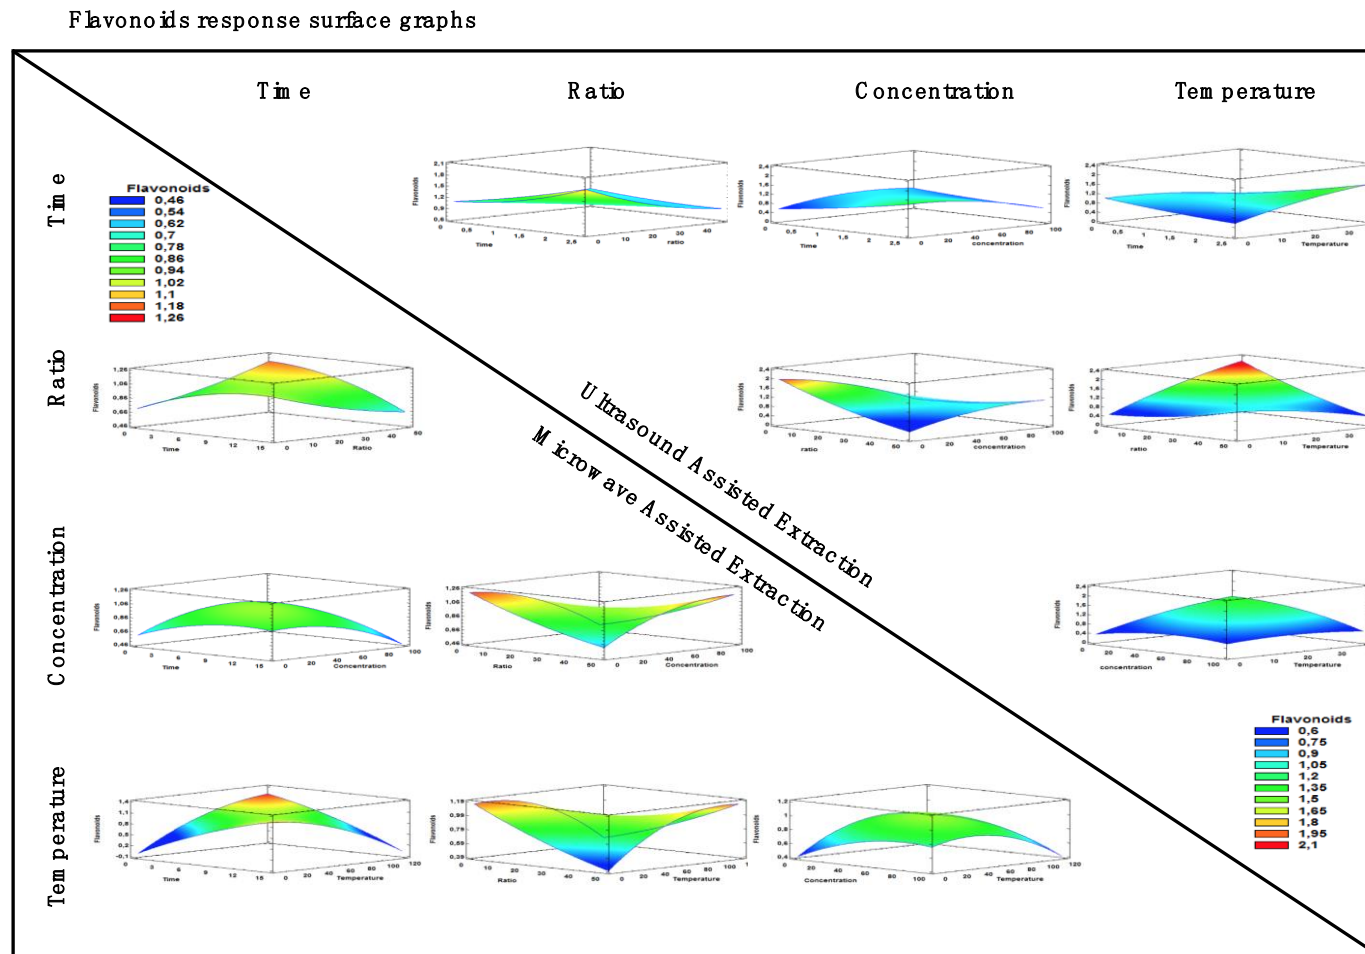

Figure S4. Antioxidant activity 3d response surface plots of UAE and MAE for the parametric responses. For representation purposes, the 2 variable which are not confronted, were positioned at the centre of their experimental domain.

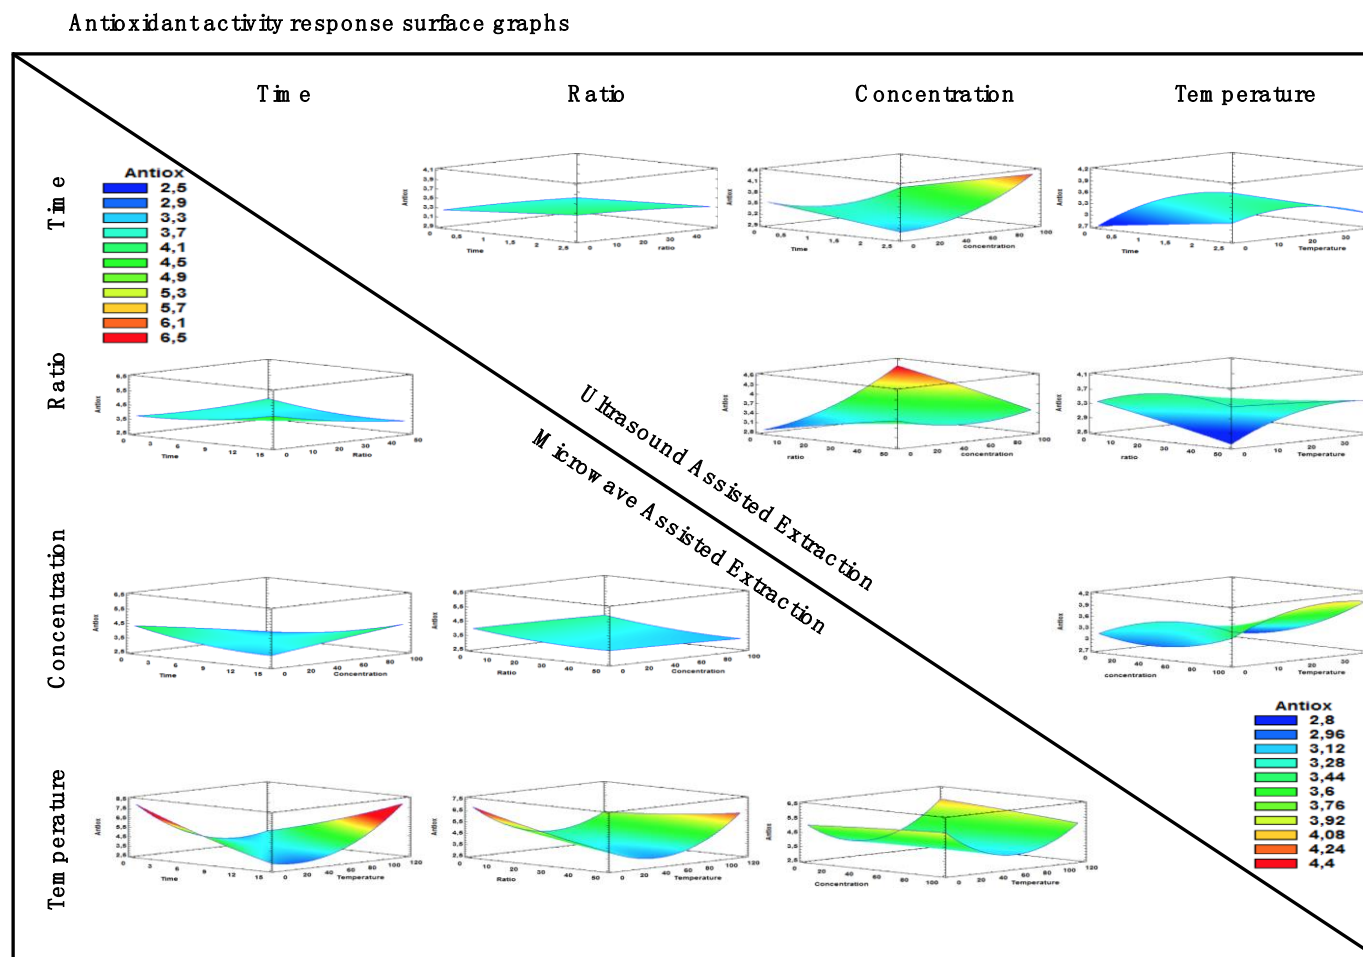

Supplement: molecules-24-03618-s001.pdf [file molecules-24-03618-s001.pdf]
